# Supplementary material for: In situ synthesis of cotton-derived Ni/C catalysts with controllable structures and enhanced catalytic performance
Source: Royal Society of Chemistry journal article supplement (doi:10.1039/c5gc01604e), 2015-09-28
Supplement: c5gc01604e1.pdf [file c5gc01604e1.pdf]

***Electronic Supplementary Information***

**In-Situ Synthesis of Cotton-Derived Ni/C Catalysts with Controllable Structure  
and Enhanced Catalytic Performance**

Peng Zhang<sup>1</sup>, Zongbin Zhao<sup>1</sup>, Boris Dyatkin<sup>2</sup>, Chang Liu<sup>1</sup>, and Jieshan Qiu<sup>1\*</sup>

<sup>1</sup>Carbon Research Laboratory, Liaoning Key Lab for Energy Materials and Chemical Engineering,  
State Key Lab of Fine Chemicals, School of Chemical Engineering, Dalian University of  
Technology, Dalian 116024, China.

<sup>2</sup>Department of Materials Science and Engineering, A. J. Drexel Nanotechnology Institute, Drexel  
University, Philadelphia, Pennsylvania 19104, USA

\*Corresponding Author. Tel: +86-411-84986024; E-mail: [jqiu@dlut.edu.cn](mailto:jqiu@dlut.edu.cn)

**Table S1.** Elemental compositions of CF and CCF

| Sample | C (%) | H (%) | O (%) |
|--------|-------|-------|-------|
| CF     | 42.2  | 6.2   | 51.6  |
| CCF    | 81.5  | 3.5   | 15    |

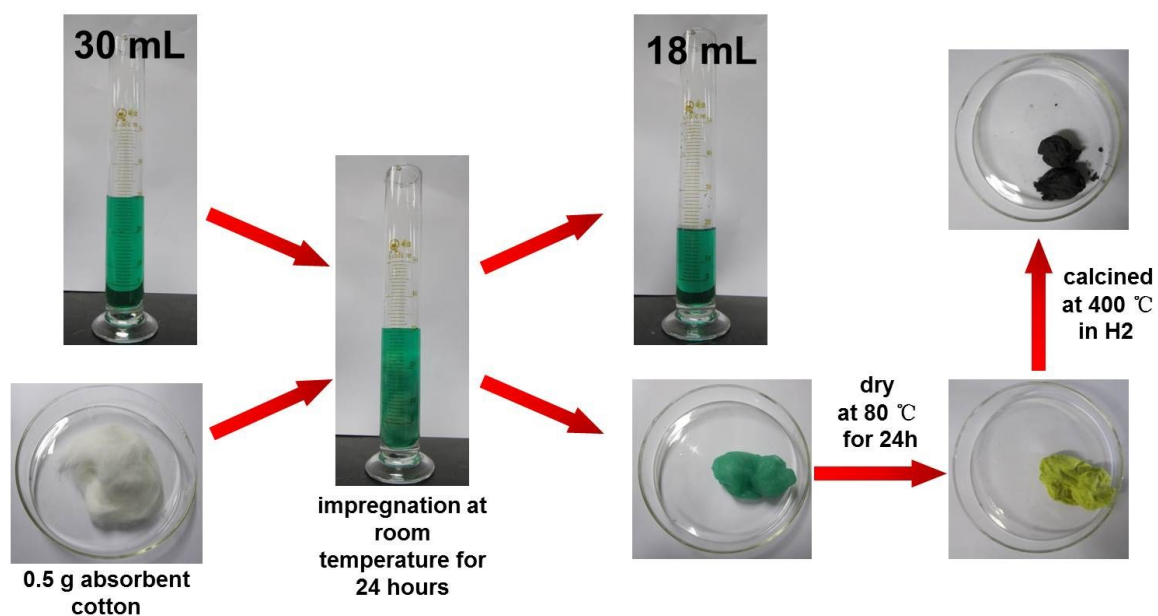

**Figure S1.** The digital photographs during the synthesis process of Ni/C catalysts.

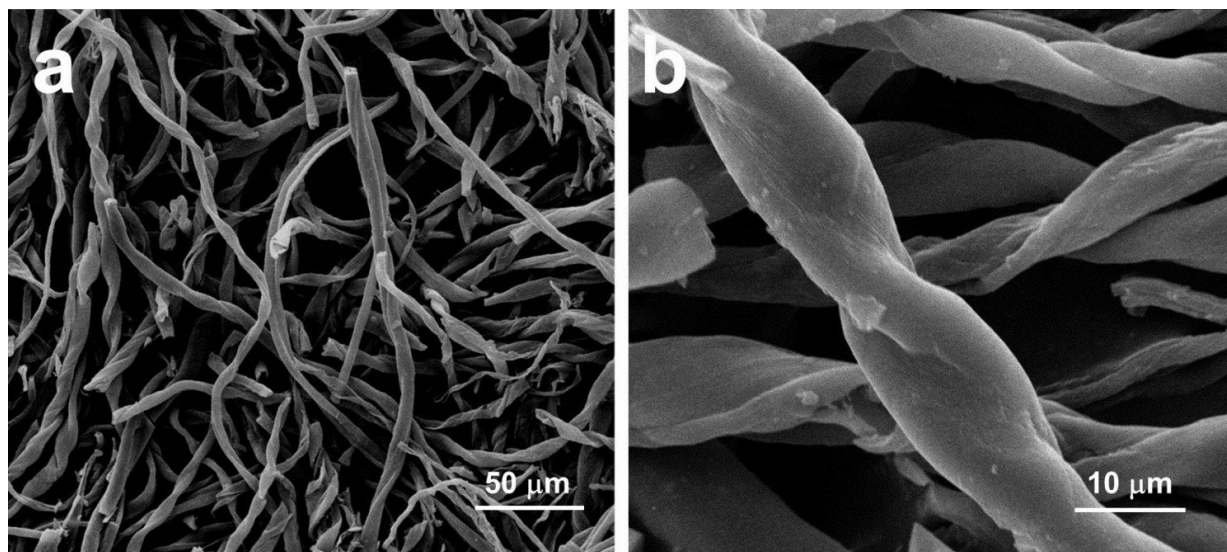

**Figure S2.** (a) Typical SEM and (b) magnified SEM images of 1-Ni/C.

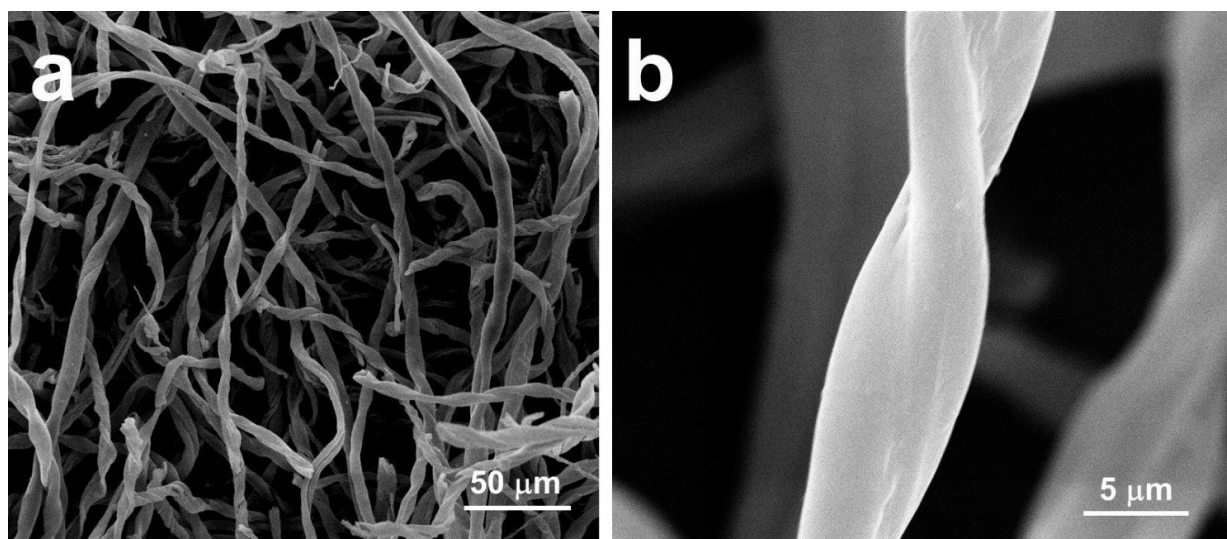

**Figure S3.** (a) Typical SEM and (b) magnified SEM images of 2-Ni/C.

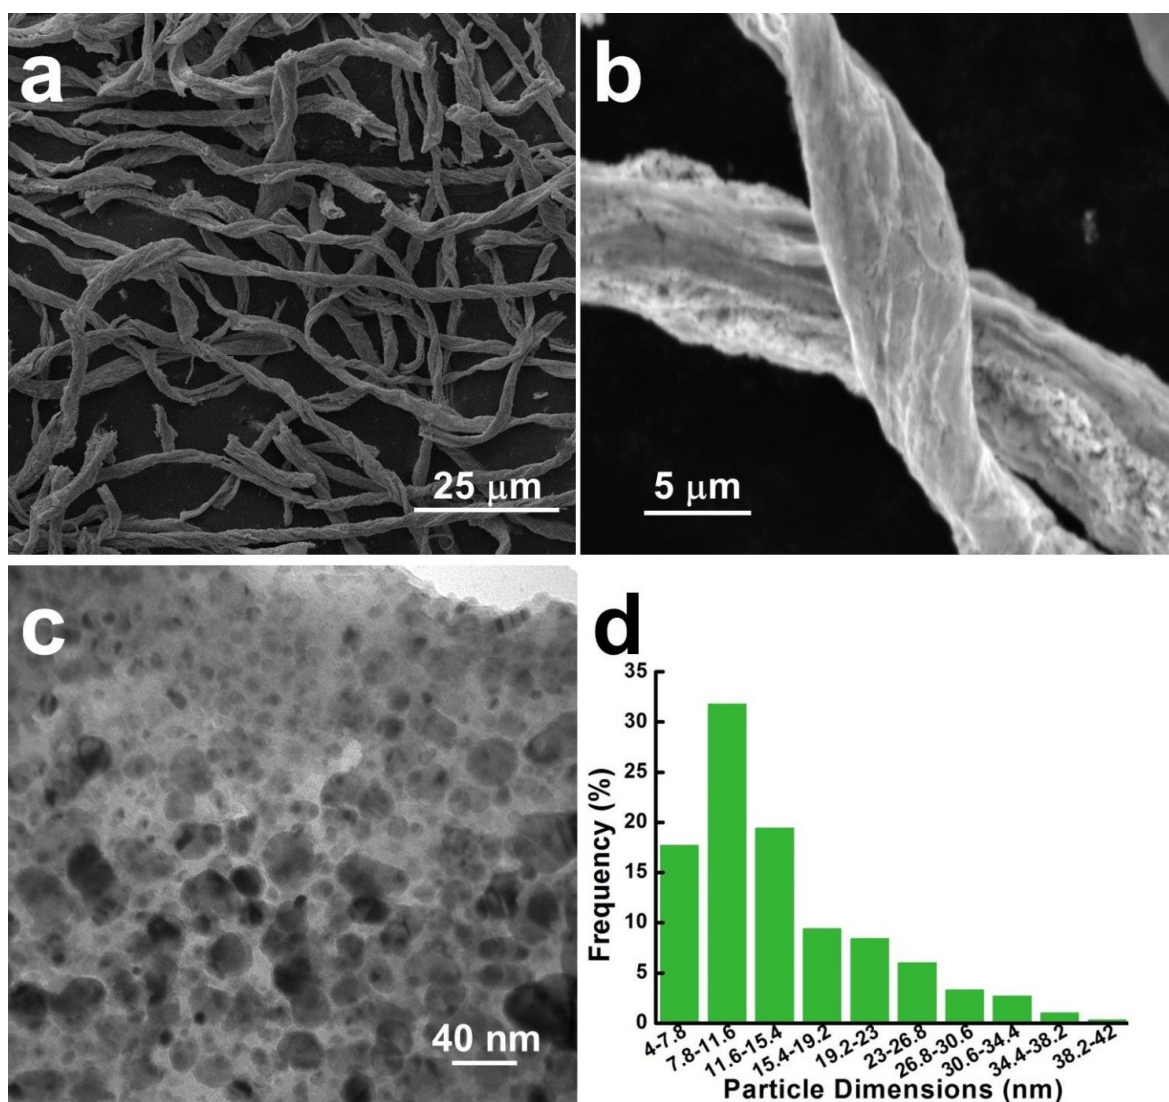

**Figure S4.** (a) Typical SEM image; (b) magnified SEM image; (c) TEM image and (d) size distributions of Ni particles of 4-Ni/C.

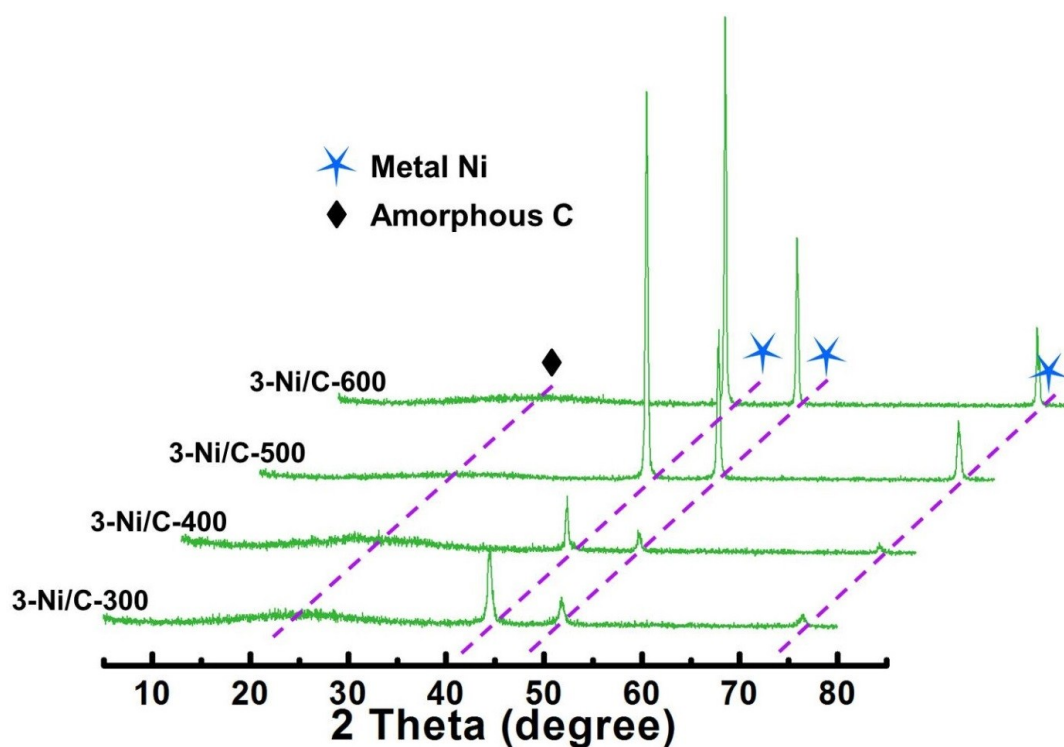

**Figure S5.** XRD patterns of 3-Ni/C catalysts calcined at different temperature.

**Table S2.** Catalytic performance of various Ni/C catalysts for the selective hydrogenation of *o*-CNB

| Catalyst | Conversion (%) | Selectivity (%) | TOF (h <sup>-1</sup> ) <sup>a</sup> |
|----------|----------------|-----------------|-------------------------------------|
| CCF      | 11.2           | 95.1            | —                                   |
| 1-Ni/C   | 21.4           | 91.4            | 12.6                                |
| 2-Ni/C   | 65.6           | 84.0            | 5.1                                 |
| 3-Ni/C   | 100            | 86.6            | 6.3                                 |
| 4-Ni/C   | 91.7           | 91.7            | 4.9                                 |

Reaction conditions: 0.50 g *o*-CNB, 0.05 g catalyst, 50 mL ethanol, 140 °C, 0.5 MPa H<sub>2</sub>, time 5 h.

<sup>a</sup> Turnover frequency (TOF) = ( $M_{CNB} \times \text{Con} \times \text{Sec}$ ) / ( $M_{Ni} \times t$ );  $M_{CNB}$ : the total amount of CNB (mol); Con: conversion of CNB (%); Sec: selectivity of CAN (%);  $M_{Ni}$ : the Ni amount in catalysts (mol); t: the reaction time (h).

**Table S3.** Catalytic performance of 3-Ni/C with different calcination temperatures for the selective hydrogenation of *o*-CNB

| Calcination Temperature (°C) | Conversion (%) | Selectivity (%) | TOF (h <sup>-1</sup> ) <sup>a</sup> |
|------------------------------|----------------|-----------------|-------------------------------------|
| 200                          | 8.5            | 96.5            | 0.6                                 |
| 300                          | 99.8           | 78.3            | 5.7                                 |
| 400                          | 100            | 86.6            | 6.3                                 |
| 500                          | 63.6           | 88.3            | 4.1                                 |
| 600                          | 25.1           | 92.7            | 1.7                                 |

Reaction conditions: 0.50 g *o*-CNB, 0.05 g catalyst, 50 mL ethanol, 140 °C, 0.5 MPa H<sub>2</sub>, time 5 h.

<sup>a</sup> Turnover frequency (TOF) = ( $M_{CNB} \times \text{Con} \times \text{Sec}$ ) / ( $M_{Ni} \times t$ );  $M_{CNB}$ : the total amount of CNB (mol); Con: conversion of CNB (%); Sec: selectivity of CAN (%);  $M_{Ni}$ : the Ni amount in catalysts (mol); t: the reaction time (h).

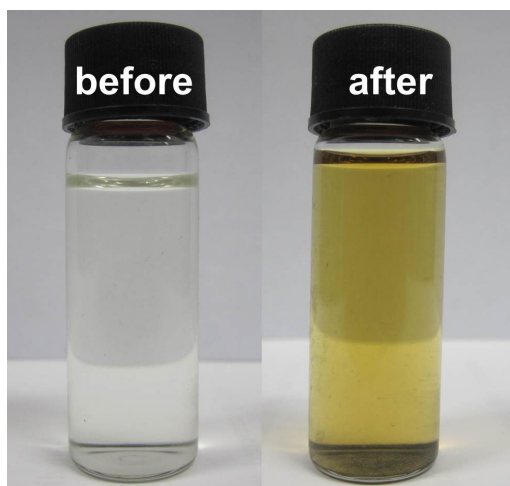

**Figure S6.** The digital photographs of reaction solutions before and after the hydrogenation of *o*-CNB.

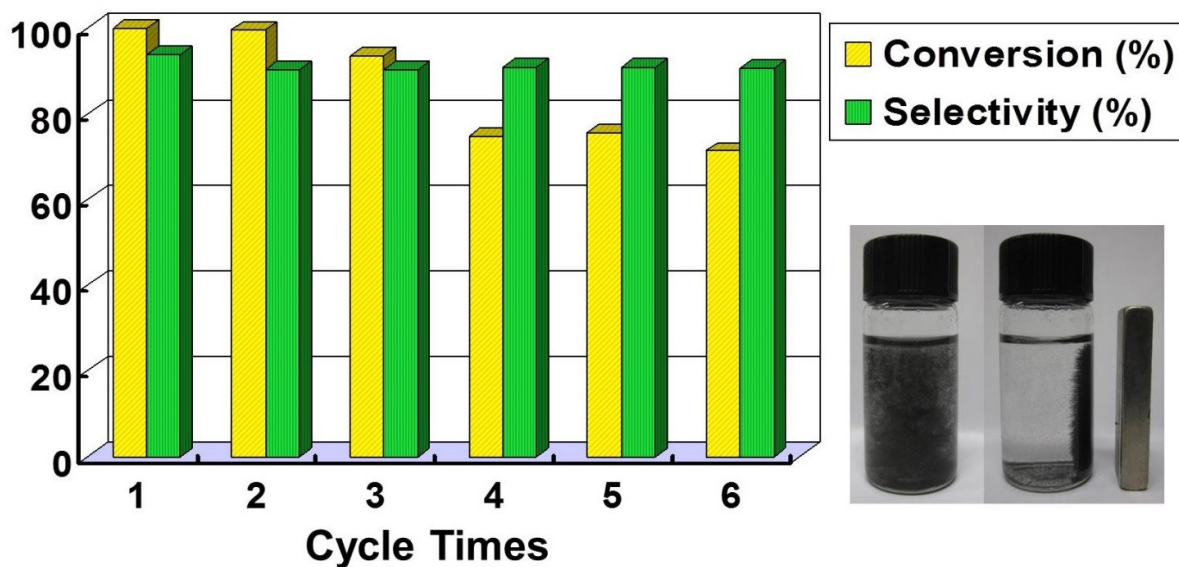

**Figure S7.** Cycling performance of 3-Ni/C for the selective hydrogenation of *o*-CNB. Reaction conditions: 0.50 g *o*-CNB, 0.05 g 3-Ni/C, 50 mL ethanol, 140 °C, 1.0 MPa H<sub>2</sub>, time 3 h. Inset shows the separation of the 3-Ni/C with a magnet after the reaction.

**Table S4.** Cycling performance of 3-Ni/C for the selective hydrogenation of *o*-CNB

| Cycle Number | Conversion (%) | Selectivity (%) |
|--------------|----------------|-----------------|
| 1            | 100            | 93.9            |
| 2            | 99.6           | 90.3            |
| 3            | 93.6           | 90.4            |
| 4            | 74.7           | 90.9            |
| 5            | 75.7           | 91.0            |
| 6            | 71.5           | 90.7            |

Reaction conditions: 0.50 g *o*-CNB, 0.05 g catalyst, 50 mL ethanol, 140 °C, 1 MPa H<sub>2</sub>, time 3 h.

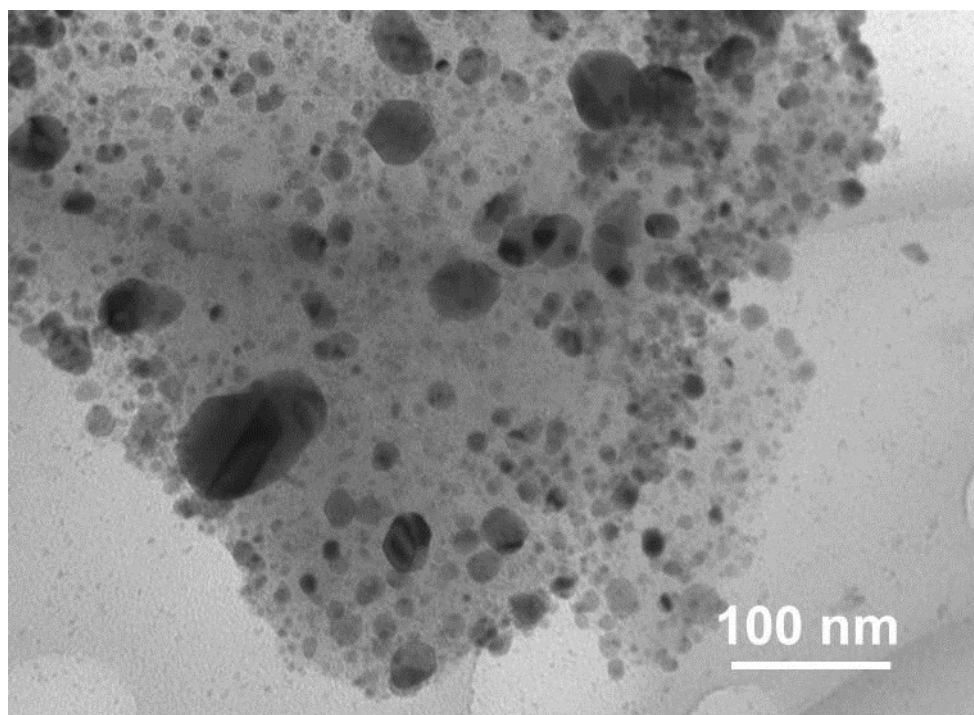

**Figure S8.** TEM image of the 3-Ni/C after 6 cycles.
